# Supplementary material for: Genetic Evolution and Molecular Selection of the HE Gene of Influenza C Virus
Source: MDPI journal article supplement (doi:10.3390/v11020167), 2019-02-19
Supplement: s1 [file s1]

## Supplementary Materials 2

**Table S1. Explanation of the variation by axis (see also eigen.coa)**

| Num. | Eigenval.    | R.Iner. | R.Sum   | Num. | Eigenval.    | R.Iner. | R.Sum   |
|------|--------------|---------|---------|------|--------------|---------|---------|
| 01   | +1.2362E-002 | +0.4065 | +0.4065 | 02   | +5.6931E-003 | +0.1872 | +0.5937 |
| 03   | +4.1631E-003 | +0.1369 | +0.7306 | 04   | +2.3873E-003 | +0.0785 | +0.8091 |
| 05   | +1.4155E-003 | +0.0465 | +0.8557 | 06   | +6.0370E-004 | +0.0199 | +0.8755 |
| 07   | +5.4706E-004 | +0.0180 | +0.8935 | 08   | +4.6315E-004 | +0.0152 | +0.9087 |
| 09   | +3.5879E-004 | +0.0118 | +0.9205 | 10   | +3.1320E-004 | +0.0103 | +0.9308 |
| 11   | +2.7100E-004 | +0.0089 | +0.9397 | 12   | +1.9725E-004 | +0.0065 | +0.9462 |
| 13   | +1.8773E-004 | +0.0062 | +0.9524 | 14   | +1.7689E-004 | +0.0058 | +0.9582 |
| 15   | +1.3922E-004 | +0.0046 | +0.9628 | 16   | +1.2029E-004 | +0.0040 | +0.9667 |
| 17   | +1.1531E-004 | +0.0038 | +0.9705 | 18   | +1.0075E-004 | +0.0033 | +0.9738 |
| 19   | +9.2863E-005 | +0.0031 | +0.9769 | 20   | +8.4135E-005 | +0.0028 | +0.9797 |
| 21   | +6.9113E-005 | +0.0023 | +0.9819 | 22   | +6.1741E-005 | +0.0020 | +0.9840 |
| 23   | +5.8198E-005 | +0.0019 | +0.9859 | 24   | +5.4864E-005 | +0.0018 | +0.9877 |
| 25   | +4.3387E-005 | +0.0014 | +0.9891 | 26   | +4.1767E-005 | +0.0014 | +0.9905 |
| 27   | +3.7682E-005 | +0.0012 | +0.9917 | 28   | +3.3319E-005 | +0.0011 | +0.9928 |
| 29   | +3.0305E-005 | +0.0010 | +0.9938 | 30   | +2.8190E-005 | +0.0009 | +0.9947 |
| 31   | +2.5782E-005 | +0.0008 | +0.9956 | 32   | +2.3218E-005 | +0.0008 | +0.9964 |
| 33   | +2.1109E-005 | +0.0007 | +0.9970 | 34   | +1.7890E-005 | +0.0006 | +0.9976 |
| 35   | +1.6137E-005 | +0.0005 | +0.9982 | 36   | +1.3459E-005 | +0.0004 | +0.9986 |
| 37   | +1.2224E-005 | +0.0004 | +0.9990 | 38   | +1.0128E-005 | +0.0003 | +0.9993 |
| 39   | +8.0348E-006 | +0.0003 | +0.9996 | 40   | +6.5610E-006 | +0.0002 | +0.9998 |

**Table S2. The relative synonymous codon usage (RSCU) patterns of ICV *M* gene and its hosts.**

| AA         | Codon         | M gene      | Swine       | Bovine      | Human       |
|------------|---------------|-------------|-------------|-------------|-------------|
| <b>Phe</b> | <b>UUU(F)</b> | <b>1.58</b> | 0.79        | 0.85        | 0.93        |
|            | <b>UUC(F)</b> | 0.42        | <b>1.21</b> | <b>1.15</b> | <b>1.07</b> |
| <b>Leu</b> | <b>UUA(L)</b> | <b>1.52</b> | 0.32        | 0.38        | 0.46        |
|            | <b>UUG(L)</b> | 1.41        | 0.67        | 0.71        | 0.77        |
|            | <b>CUU(L)</b> | 0.75        | 1.35        | 0.70        | 0.79        |
|            | <b>CUC(L)</b> | 0.52        | 1.35        | 1.26        | 1.17        |
|            | <b>CUA(L)</b> | 1.25        | 0.33        | 0.36        | 0.43        |
|            | <b>CUG(L)</b> | 0.55        | <b>2.68</b> | <b>2.59</b> | <b>2.37</b> |
| <b>Ile</b> | <b>AUU(I)</b> | 1.22        | 0.91        | 0.98        | 1.08        |
|            | <b>AUC(I)</b> | 0.45        | <b>1.67</b> | <b>1.57</b> | <b>1.41</b> |
|            | <b>AUA(I)</b> | <b>1.34</b> | 0.42        | 0.45        | 0.51        |
| <b>Val</b> | <b>GUU(V)</b> | <b>1.99</b> | 0.57        | 0.64        | 0.73        |
|            | <b>GUC(V)</b> | 0.52        | 1.07        | 1.01        | 0.95        |
|            | <b>GUA(V)</b> | 0.98        | 0.34        | 0.40        | 0.47        |
|            | <b>GUG(V)</b> | 0.52        | <b>2.03</b> | <b>1.95</b> | <b>1.85</b> |
| <b>Ser</b> | <b>UCU(S)</b> | 1.67        | 0.99        | 1.04        | 1.13        |
|            | <b>UCC(S)</b> | 0.25        | 1.50        | 1.37        | 1.31        |
|            | <b>UCA(S)</b> | 1.66        | 0.73        | 0.79        | 0.90        |
|            | <b>UCG(S)</b> | 0.27        | 0.39        | 0.39        | 0.33        |
|            | <b>AGU(S)</b> | <b>1.68</b> | 0.77        | 0.87        | 0.90        |
|            | <b>AGC(S)</b> | 0.48        | <b>1.62</b> | <b>1.53</b> | <b>1.44</b> |
| <b>Pro</b> | <b>CCU(P)</b> | <b>1.94</b> | 1.05        | 1.08        | 1.15        |
|            | <b>CCC(P)</b> | 0.71        | <b>1.46</b> | <b>1.39</b> | <b>1.29</b> |
|            | <b>CCA(P)</b> | 1.34        | 0.94        | 1.00        | 1.11        |
|            | <b>CCG(P)</b> | 0.01        | 0.56        | 0.53        | 0.45        |

|     |        |             |             |             |             |
|-----|--------|-------------|-------------|-------------|-------------|
| Thr | ACU(T) | 0.98        | 0.83        | 0.89        | 0.99        |
|     | ACC(T) | 0.87        | <b>1.68</b> | <b>1.55</b> | <b>1.42</b> |
|     | ACA(T) | <b>2.14</b> | 0.92        | 1.01        | 1.14        |
|     | ACG(T) | 0.02        | 0.57        | 0.56        | 0.46        |
| Ala | GCU(A) | 1.21        | 0.96        | 1.00        | 1.06        |
|     | GCC(A) | 1           | <b>1.80</b> | <b>1.71</b> | <b>1.60</b> |
|     | GCA(A) | <b>1.69</b> | 0.74        | 0.80        | 0.91        |
|     | GCG(A) | 0.11        | 0.50        | 0.48        | 0.42        |
| Tyr | UAU(Y) | <b>1.11</b> | 0.73        | 0.79        | 0.89        |
|     | UAC(Y) | 0.89        | <b>1.27</b> | <b>1.21</b> | <b>1.11</b> |
| His | CAU(H) | <b>1.02</b> | 0.70        | 0.75        | 0.84        |
|     | CAC(H) | 0.98        | <b>1.30</b> | <b>1.25</b> | <b>1.16</b> |
| Gln | CAA(Q) | <b>1.98</b> | 0.44        | 0.46        | 0.53        |
|     | CAG(Q) | 0.02        | <b>1.56</b> | <b>1.54</b> | <b>1.47</b> |
| Asn | AAU(N) | <b>1.32</b> | 0.79        | 0.81        | 1.08        |
|     | AAC(N) | 0.68        | <b>1.21</b> | <b>1.19</b> | <b>1.41</b> |
| Lys | AAA(K) | <b>1.53</b> | 0.76        | 0.78        | 0.87        |
|     | AAG(K) | 0.47        | <b>1.24</b> | <b>1.22</b> | <b>1.13</b> |
| Asp | GAU(D) | 0.79        | 0.80        | 0.84        | 0.93        |
|     | GAC(D) | <b>1.21</b> | <b>1.20</b> | <b>1.16</b> | <b>1.07</b> |
| Glu | GAA(E) | <b>1.5</b>  | 0.72        | 0.78        | 0.84        |
|     | GAG(E) | 0.5         | <b>1.28</b> | <b>1.22</b> | <b>1.16</b> |
| Cys | UGU(C) | 0.79        | 0.79        | 0.85        | 0.91        |
|     | UGC(C) | <b>1.21</b> | <b>1.21</b> | <b>1.15</b> | <b>1.09</b> |
| Arg | CGU(R) | 0           | 0.44        | 0.49        | 0.48        |
|     | CGC(R) | 0           | <b>1.31</b> | 1.17        | 1.10        |
|     | CGA(R) | 0.6         | 0.60        | 0.68        | 0.65        |
|     | CGG(R) | 0           | 1.29        | <b>1.32</b> | 1.21        |
|     | AGA(R) | <b>3.9</b>  | 1.12        | 1.14        | <b>1.29</b> |
|     | AGG(R) | 1.5         | 1.23        | 1.20        | 1.27        |
| Gly | GGU(G) | 0.65        | 0.57        | 0.64        | 0.65        |
|     | GGC(G) | 0.51        | <b>1.46</b> | <b>1.43</b> | <b>1.35</b> |
|     | GGA(G) | <b>2.6</b>  | 0.91        | 0.95        | 1.00        |
|     | GGG(G) | 0.25        | 1.05        | 0.99        | 1.00        |

Preferred codons of overall ICV *M* gene and potential hosts are shown in bold.

**Table S3. The site-by-site selection analysis results of the rest of amino acids**

| Gene | AA   | FEL    |         | SLAC   |         | FUBAR  |          | MEME                 |         |
|------|------|--------|---------|--------|---------|--------|----------|----------------------|---------|
|      | Site | dN-dS  | P-value | dN-dS  | p-value | dN-dS  | Post.Pro | dN <sup>+</sup> - dS | p-value |
| HE   | 1    | -1.185 | 0.066   | -1.912 | 1.0000  | -2.238 | 0.028    | -1.18                | 0.67    |
|      | 2    | 0.26   | 0.522   | 0.718  | 0.7270  | -0.362 | 0.411    | 0.37                 | 0.45    |
|      | 3    | 0.231  | 0.701   | 0.547  | 0.9329  | -0.792 | 0.321    | 47.08                | 0.37    |
|      | 4    | -0.858 | 0.049   | -3.483 | 1.0000  | -2.192 | 0.018    | -0.86                | 0.67    |
|      | 5    | 0      | 1       | 0.000  | 1.0000  | -1.562 | 0.1      | 0                    | 1       |
|      | 6    | 0      | 1       | 0.000  | 1.0000  | -0.47  | 0.251    | 0                    | 1       |
|      | 7    | 0      | 1       | 0.000  | 1.0000  | -0.774 | 0.184    | 0                    | 1       |
|      | 8    | 0      | 1       | 0.000  | 1.0000  | -1.013 | 0.19     | 0                    | 1       |
|      | 9    | 0      | 1       | 0.000  | 1.0000  | -0.5   | 0.246    | 0                    | 1       |
|      | 10   | 0      | 1       | 0.000  | 1.0000  | -1.013 | 0.19     | 0                    | 1       |
|      | 11   | -0.379 | 0.194   | -1.531 | 1.0000  | -1.35  | 0.072    | -0.38                | 0.67    |
|      | 12   | -1.283 | 0.023   | -4.077 | 1.0000  | -2.195 | 0.017    | -1.28                | 0.67    |
|      | 13   | 0      | 1       | 0.000  | 1.0000  | -0.863 | 0.175    | 0                    | 1       |

|    |        |       |         |        |        |       |                |          |
|----|--------|-------|---------|--------|--------|-------|----------------|----------|
| 14 | 0      | 1     | 0.000   | 1.0000 | -0.517 | 0.224 | 0              | 1        |
| 15 | -0.614 | 0.147 | -2.045  | 1.0000 | -1.377 | 0.071 | -0.61          | 0.67     |
| 16 | 0      | 1     | 0.000   | 1.0000 | -0.517 | 0.224 | 0              | 1        |
| 17 | -0.366 | 0.301 | -0.876  | 1.0000 | -0.848 | 0.137 | -0.37          | 0.67     |
| 18 | -1.24  | 0.024 | -4.090  | 1.0000 | -2.193 | 0.015 | -1.24          | 0.67     |
| 19 | 0.258  | 0.503 | 0.691   | 0.7385 | -0.171 | 0.463 | 2018.18        | 0.11     |
| 20 | -0.236 | 0.62  | -0.765  | 0.8889 | -0.467 | 0.279 | -0.47          | 0.67     |
| 21 | -5.293 | 0     | -11.966 | 1.0000 | -5.223 | 0     | -5.29          | 0.67     |
| 22 | -0.643 | 0.372 | -0.735  | 0.8830 | -1.297 | 0.157 | -0.89          | 0.67     |
| 23 | 0      | 1     | 0.000   | 1.0000 | -0.969 | 0.167 | 0              | 1        |
| 24 | -1.048 | 0.072 | -1.952  | 1.0000 | -1.889 | 0.041 | -1.05          | 0.67     |
| 25 | -0.354 | 0.313 | -0.929  | 1.0000 | -0.944 | 0.129 | -0.35          | 0.67     |
| 26 | -1.025 | 0.105 | -1.954  | 1.0000 | -1.823 | 0.051 | -1.03          | 0.67     |
| 27 | -0.46  | 0.15  | -1.531  | 1.0000 | -1.2   | 0.076 | -0.46          | 0.67     |
| 28 | -2.678 | 0.003 | -4.592  | 1.0000 | -3.347 | 0.001 | -2.68          | 0.67     |
| 29 | 0      | 1     | 0.000   | 1.0000 | -1.117 | 0.155 | 0              | 1        |
| 30 | 0      | 1     | 0.000   | 1.0000 | -1.117 | 0.155 | 0              | 1        |
| 31 | 0.261  | 0.522 | 0.718   | 0.7269 | -0.362 | 0.412 | 0.46           | 0.45     |
| 32 | 0      | 1     | 0.000   | 1.0000 | -1.07  | 0.152 | 0              | 1        |
| 33 | 0      | 1     | 0.000   | 1.0000 | -2.434 | 0.064 | 0              | 1        |
| 34 | 0      | 1     | 0.000   | 1.0000 | -0.812 | 0.196 | 0              | 1        |
| 35 | -1.991 | 0.004 | -7.046  | 1.0000 | -3.029 | 0.001 | -1.99          | 0.67     |
| 36 | -0.823 | 0.101 | -1.531  | 1.0000 | -1.813 | 0.039 | -0.82          | 0.67     |
| 37 | -2.826 | 0.002 | -6.123  | 1.0000 | -3.084 | 0.001 | -2.83          | 0.67     |
| 38 | -0.43  | 0.164 | -1.741  | 1.0000 | -1.432 | 0.069 | -0.43          | 0.67     |
| 39 | -2.228 | 0.013 | -6.889  | 0.9986 | -3.05  | 0.002 | -2.5           | 0.67     |
| 40 | -1.122 | 0.068 | -1.907  | 1.0000 | -2.208 | 0.029 | -1.12          | 0.67     |
| 41 | 0.508  | 0.297 | 1.531   | 0.4444 | 0.114  | 0.606 | 49.9           | 0.17     |
| 42 | 0      | 1     | 0.000   | 1.0000 | -0.969 | 0.167 | 0              | 1        |
| 43 | -1.509 | 0.01  | -4.592  | 1.0000 | -2.53  | 0.004 | -1.51          | 0.67     |
| 44 | -0.709 | 0.132 | -1.531  | 1.0000 | -1.643 | 0.053 | -0.71          | 0.67     |
| 45 | -2.928 | 0.001 | -9.185  | 1.0000 | -3.312 | 0     | -2.93          | 0.67     |
| 46 | -1.328 | 0.049 | -3.687  | 1.0000 | -2.575 | 0.004 | -1.33          | 0.67     |
| 47 | -1.051 | 0.072 | -1.952  | 1.0000 | -1.891 | 0.041 | -1.05          | 0.67     |
| 48 | -2.567 | 0.019 | -3.809  | 1.0000 | -3.09  | 0.008 | -2.57          | 0.67     |
| 49 | -3.213 | 0.001 | -5.865  | 1.0000 | -3.02  | 0.001 | -3.21          | 0.67     |
| 50 | 0.254  | 0.465 | 0.765   | 0.6667 | -0.296 | 0.417 | 0.38           | 0.42     |
| 51 | 0      | 1     | 0.000   | 1.0000 | -2.4   | 0.133 | 0              | 1        |
| 52 | -0.882 | 0.092 | -1.720  | 1.0000 | -1.802 | 0.044 | -0.88          | 0.67     |
| 53 | -0.234 | 0.621 | -0.768  | 0.8892 | -0.465 | 0.28  | -0.47          | 0.67     |
| 54 | 0      | 1     | 0.000   | 1.0000 | -0.812 | 0.196 | 0              | 1        |
| 55 | -0.829 | 0.083 | -1.531  | 1.0000 | -2.039 | 0.033 | -0.83          | 0.67     |
| 56 | -1.053 | 0.071 | -1.952  | 1.0000 | -1.89  | 0.041 | -1.05          | 0.67     |
| 57 | -0.84  | 0.134 | -1.531  | 1.0000 | -2.02  | 0.037 | -0.84          | 0.67     |
| 58 | -2.302 | 0.001 | -7.675  | 1.0000 | -3.352 | 0     | -2.3           | 0.67     |
| 59 | 0      | 1     | 0.000   | 1.0000 | -0.767 | 0.187 | 0              | 1        |
| 60 | -0.618 | 0.11  | -2.042  | 1.0000 | -1.393 | 0.068 | -0.62          | 0.67     |
| 61 | 0.549  | 0.354 | 1.495   | 0.5164 | 0.004  | 0.565 | 35.62          | 0.21     |
| 62 | 0.654  | 0.164 | 2.087   | 0.3949 | 0.54   | 0.767 | 2.27           | 0.18     |
| 63 | -1.051 | 0.072 | -1.952  | 1.0000 | -1.891 | 0.041 | -1.05          | 0.67     |
| 64 | -1.385 | 0.186 | -2.211  | 0.9544 | -2.454 | 0.046 | -1.41          | 0.67     |
| 65 | 1.041  | 0.144 | 2.997   | 0.2151 | 0.998  | 0.811 | <b>1670.22</b> | <b>0</b> |
| 66 | 0      | 1     | 0.000   | 1.0000 | -0.812 | 0.196 | 0              | 1        |
| 67 | -3.068 | 0.001 | -6.123  | 1.0000 | -3.188 | 0     | -3.07          | 0.67     |
| 68 | -1.737 | 0.045 | -6.060  | 0.9928 | -3.588 | 0.004 | -2.23          | 0.67     |
| 69 | -1.697 | 0.025 | -3.062  | 1.0000 | -2.472 | 0.01  | -1.7           | 0.67     |

|     |        |       |         |        |        |       |       |      |
|-----|--------|-------|---------|--------|--------|-------|-------|------|
| 70  | -2.819 | 0.001 | -7.654  | 1.0000 | -3.713 | 0     | -2.82 | 0.67 |
| 71  | 0      | 1     | 0.000   | 1.0000 | -0.822 | 0.192 | 0     | 1    |
| 72  | -0.821 | 0.101 | -1.531  | 1.0000 | -1.772 | 0.046 | -0.82 | 0.67 |
| 73  | -0.857 | 0.13  | -1.531  | 1.0000 | -2.008 | 0.037 | -0.86 | 0.67 |
| 74  | -0.808 | 0.538 | -0.205  | 0.7086 | -1.489 | 0.186 | -1.43 | 0.67 |
| 75  | -2.505 | 0.026 | -4.905  | 0.9940 | -3.954 | 0.01  | -2.51 | 0.67 |
| 76  | -0.652 | 0.384 | -0.765  | 0.8889 | -1.035 | 0.178 | -0.69 | 0.67 |
| 77  | -1.43  | 0.021 | -3.062  | 1.0000 | -2.375 | 0.011 | -1.43 | 0.67 |
| 78  | 1.042  | 0.178 | 2.766   | 0.2968 | 1.225  | 0.821 | 1.04  | 0.2  |
| 79  | -0.982 | 0.04  | -3.544  | 1.0000 | -2.304 | 0.014 | -0.98 | 0.67 |
| 80  | -1.005 | 0.103 | -1.960  | 1.0000 | -1.841 | 0.045 | -1.01 | 0.67 |
| 81  | -1.265 | 0.114 | -2.300  | 0.9631 | -1.791 | 0.064 | -1.5  | 0.67 |
| 82  | -0.487 | 0.535 | -0.766  | 0.8890 | -0.921 | 0.203 | -0.84 | 0.67 |
| 83  | -0.924 | 0.332 | -2.484  | 0.9388 | -2.1   | 0.027 | -1.45 | 0.67 |
| 84  | -0.468 | 0.544 | -0.765  | 0.8889 | -0.895 | 0.207 | -0.58 | 0.67 |
| 85  | -0.818 | 0.081 | -1.531  | 1.0000 | -1.784 | 0.044 | -0.82 | 0.67 |
| 86  | -2.403 | 0.003 | -4.592  | 1.0000 | -3.194 | 0.001 | -2.4  | 0.67 |
| 87  | -1.54  | 0.018 | -4.592  | 1.0000 | -2.531 | 0.005 | -1.54 | 0.67 |
| 88  | -1.589 | 0.036 | -3.739  | 1.0000 | -2.678 | 0.003 | -1.59 | 0.67 |
| 89  | 0      | 1     | 0.000   | 1.0000 | -2.434 | 0.064 | 0     | 1    |
| 90  | -1.538 | 0.033 | -4.554  | 1.0000 | -2.69  | 0.001 | -1.54 | 0.67 |
| 91  | 0      | 1     | 0.000   | 1.0000 | -0.863 | 0.175 | 0     | 1    |
| 92  | 0      | 1     | 0.000   | 1.0000 | -2.434 | 0.064 | 0     | 1    |
| 93  | 0      | 1     | 0.000   | 1.0000 | -0.812 | 0.196 | 0     | 1    |
| 94  | -2.411 | 0.001 | -7.654  | 1.0000 | -2.945 | 0     | -2.41 | 0.67 |
| 95  | -2.868 | 0.002 | -4.592  | 1.0000 | -3.343 | 0.001 | -2.87 | 0.67 |
| 96  | -0.825 | 0.089 | -1.531  | 1.0000 | -1.841 | 0.035 | -0.82 | 0.67 |
| 97  | -0.379 | 0.161 | -1.531  | 1.0000 | -1.367 | 0.068 | -0.38 | 0.67 |
| 98  | -0.986 | 0.04  | -3.547  | 1.0000 | -2.304 | 0.014 | -0.99 | 0.67 |
| 99  | -1.151 | 0.29  | -1.536  | 0.8893 | -2.196 | 0.092 | -1.16 | 0.67 |
| 100 | -3.819 | 0     | -10.074 | 1.0000 | -3.548 | 0     | -3.82 | 0.67 |
| 101 | -2.042 | 0.013 | -6.077  | 1.0000 | -2.62  | 0.005 | -2.04 | 0.67 |
| 102 | -0.826 | 0.101 | -1.531  | 1.0000 | -1.818 | 0.039 | -0.83 | 0.67 |
| 103 | -0.665 | 0.153 | -2.026  | 1.0000 | -1.41  | 0.078 | -0.66 | 0.67 |
| 104 | 0      | 1     | 0.000   | 1.0000 | -1.013 | 0.19  | 0     | 1    |
| 105 | 0      | 1     | 0.000   | 1.0000 | -0.969 | 0.167 | 0     | 1    |
| 106 | 0      | 1     | 0.000   | 1.0000 | -0.819 | 0.193 | 0     | 1    |
| 107 | -0.845 | 0.081 | -1.531  | 1.0000 | -2.059 | 0.032 | -0.84 | 0.67 |
| 108 | -0.992 | 0.077 | -1.890  | 1.0000 | -2.13  | 0.031 | -0.99 | 0.67 |
| 109 | -1.05  | 0.072 | -1.952  | 1.0000 | -1.926 | 0.035 | -1.05 | 0.67 |
| 110 | -3.347 | 0     | -9.053  | 1.0000 | -4.57  | 0     | -3.34 | 0.67 |
| 111 | -1.688 | 0.02  | -3.062  | 1.0000 | -2.47  | 0.01  | -1.69 | 0.67 |
| 112 | 0      | 1     | 0.000   | 1.0000 | -0.812 | 0.196 | 0     | 1    |
| 113 | 0      | 1     | 0.000   | 1.0000 | -0.772 | 0.212 | 0     | 1    |
| 114 | -1.188 | 0.066 | -1.912  | 1.0000 | -2.24  | 0.028 | -1.19 | 0.67 |
| 115 | 0      | 1     | 0.000   | 1.0000 | -0.969 | 0.167 | 0     | 1    |
| 116 | -1.935 | 0.008 | -4.592  | 1.0000 | -2.678 | 0.003 | -1.94 | 0.67 |
| 117 | -0.371 | 0.519 | -1.365  | 0.9377 | -0.591 | 0.256 | -0.63 | 0.67 |
| 118 | 0      | 1     | 0.000   | 1.0000 | -2.4   | 0.133 | 0     | 1    |
| 119 | -6.213 | 0     | -11.818 | 1.0000 | -6.349 | 0     | -6.21 | 0.67 |
| 120 | 0.254  | 0.465 | 0.765   | 0.6667 | -0.335 | 0.396 | 0.33  | 0.42 |
| 121 | -0.494 | 0.609 | -0.525  | 0.8240 | -0.755 | 0.29  | -0.6  | 0.67 |
| 122 | 0.253  | 0.461 | 0.765   | 0.6667 | -0.158 | 0.459 | 0.32  | 0.42 |
| 123 | 0      | 1     | 0.000   | 1.0000 | -0.764 | 0.188 | 0     | 1    |
| 124 | -4.61  | 0.002 | -9.753  | 1.0000 | -3.794 | 0.003 | -4.61 | 0.67 |
| 125 | 1.338  | 0.13  | 3.455   | 0.2197 | 2.107  | 0.884 | 1.34  | 0.16 |

|     |        |       |         |        |        |       |              |             |
|-----|--------|-------|---------|--------|--------|-------|--------------|-------------|
| 126 | -1.019 | 0.081 | -1.956  | 1.0000 | -1.861 | 0.043 | -1.02        | 0.67        |
| 127 | -0.612 | 0.164 | -2.045  | 1.0000 | -1.318 | 0.085 | -0.61        | 0.67        |
| 128 | 0.449  | 0.377 | 1.500   | 0.4805 | -0.03  | 0.555 | 0.49         | 0.36        |
| 129 | -1.787 | 0.015 | -3.753  | 1.0000 | -2.737 | 0.007 | -1.79        | 0.67        |
| 130 | -3.197 | 0.002 | -5.871  | 1.0000 | -3.017 | 0.002 | -3.2         | 0.67        |
| 131 | 0      | 1     | 0.000   | 1.0000 | -2.4   | 0.133 | 0            | 1           |
| 132 | -1.433 | 0.021 | -3.062  | 1.0000 | -2.38  | 0.01  | -1.43        | 0.67        |
| 133 | -4.094 | 0     | -10.004 | 1.0000 | -3.732 | 0     | -4.09        | 0.67        |
| 134 | -1.658 | 0.011 | -4.921  | 1.0000 | -2.569 | 0.004 | -1.66        | 0.67        |
| 135 | -0.818 | 0.092 | -1.864  | 1.0000 | -2.005 | 0.036 | -0.82        | 0.67        |
| 136 | -1.377 | 0.039 | -4.426  | 1.0000 | -2.617 | 0.002 | -1.38        | 0.67        |
| 137 | 0      | 1     | 0.000   | 1.0000 | -0.825 | 0.19  | 0            | 1           |
| 138 | -1.239 | 0.04  | -4.090  | 1.0000 | -2.156 | 0.019 | -1.24        | 0.67        |
| 139 | 0      | 1     | 0.000   | 1.0000 | -0.411 | 0.294 | 0            | 1           |
| 140 | 0.26   | 0.522 | 0.718   | 0.7269 | -0.362 | 0.411 | 0.34         | 0.45        |
| 141 | 0.713  | 0.16  | 2.040   | 0.4228 | 0.624  | 0.777 | 0.71         | 0.18        |
| 142 | -0.759 | 0.106 | -1.701  | 1.0000 | -1.679 | 0.05  | -0.76        | 0.67        |
| 143 | 0      | 1     | 0.000   | 1.0000 | -0.772 | 0.212 | 0            | 1           |
| 144 | 0      | 1     | 0.000   | 1.0000 | -1.117 | 0.155 | 0            | 1           |
| 145 | -0.65  | 0.167 | -1.840  | 1.0000 | -1.64  | 0.052 | -0.65        | 0.67        |
| 146 | -1.665 | 0.016 | -3.062  | 1.0000 | -2.476 | 0.009 | -1.67        | 0.67        |
| 147 | 0      | 1     | 0.000   | 1.0000 | -0.934 | 0.18  | 0            | 1           |
| 148 | 0.372  | 0.453 | 0.967   | 0.6643 | -0.248 | 0.455 | 0.37         | 0.41        |
| 149 | -0.837 | 0.135 | -1.531  | 1.0000 | -2.017 | 0.037 | -0.84        | 0.67        |
| 150 | 0      | 1     | 0.000   | 1.0000 | -0.865 | 0.174 | 0            | 1           |
| 151 | 0      | 1     | 0.000   | 1.0000 | -0.47  | 0.251 | 0            | 1           |
| 152 | -2.274 | 0.035 | -7.795  | 0.9982 | -2.841 | 0.028 | -2.51        | 0.67        |
| 153 | -0.612 | 0.096 | -2.045  | 1.0000 | -1.424 | 0.059 | -0.61        | 0.67        |
| 154 | -1.945 | 0.02  | -4.660  | 1.0000 | -2.875 | 0.001 | -1.94        | 0.67        |
| 155 | -0.883 | 0.054 | -3.062  | 1.0000 | -2.259 | 0.015 | -0.88        | 0.67        |
| 156 | 0      | 1     | 0.000   | 1.0000 | -0.825 | 0.19  | 0            | 1           |
| 157 | -2.823 | 0.006 | -6.889  | 0.9986 | -3.871 | 0.001 | -3.12        | 0.67        |
| 158 | -0.32  | 0.331 | -0.920  | 1.0000 | -0.835 | 0.141 | -0.32        | 0.67        |
| 159 | -0.629 | 0.108 | -2.042  | 1.0000 | -1.414 | 0.067 | -0.63        | 0.67        |
| 160 | -2.459 | 0.009 | -3.821  | 1.0000 | -3.031 | 0.005 | -2.46        | 0.67        |
| 161 | -0.82  | 0.09  | -1.531  | 1.0000 | -1.804 | 0.04  | -0.82        | 0.67        |
| 162 | -1.303 | 0.146 | -2.669  | 0.9729 | -1.769 | 0.073 | -1.62        | 0.67        |
| 163 | -2.766 | 0.001 | -6.123  | 1.0000 | -3.182 | 0     | -2.77        | 0.67        |
| 164 | -0.619 | 0.223 | -0.966  | 1.0000 | -1.499 | 0.079 | -0.62        | 0.67        |
| 165 | 0.7    | 0.666 | 2.956   | 0.3380 | 2.117  | 0.652 | 1.19         | 0.53        |
| 166 | -0.016 | 0.986 | -1.531  | 0.8267 | -0.679 | 0.201 | -0.02        | 0.67        |
| 167 | 0      | 1     | 0.000   | 1.0000 | -0.767 | 0.187 | 0            | 1           |
| 168 | -0.68  | 0.641 | 0.407   | 0.6246 | -0.677 | 0.268 | -4.24        | 0.67        |
| 169 | -1.708 | 0.004 | -6.123  | 1.0000 | -2.906 | 0.001 | -1.71        | 0.67        |
| 170 | 0.591  | 0.265 | 1.531   | 0.4445 | 0.185  | 0.628 | <b>90.21</b> | <b>0</b>    |
| 171 | 0.253  | 0.466 | 0.766   | 0.6666 | -0.292 | 0.418 | 0.36         | 0.42        |
| 172 | 1.233  | 0.426 | 4.205   | 0.2186 | 4.348  | 0.832 | <b>13.73</b> | <b>0.01</b> |
| 173 | 0      | 1     | 0.000   | 1.0000 | -0.825 | 0.19  | 0            | 1           |
| 174 | 0      | 1     | 0.000   | 1.0000 | -0.47  | 0.251 | 0            | 1           |
| 175 | 0      | 1     | 0.000   | 1.0000 | -0.487 | 0.241 | 0            | 1           |
| 177 | -1.354 | 0.016 | -4.053  | 1.0000 | -2.266 | 0.013 | -1.35        | 0.67        |
| 178 | -0.613 | 0.147 | -2.045  | 1.0000 | -1.376 | 0.071 | -0.61        | 0.67        |
| 179 | -2.29  | 0.018 | -3.785  | 1.0000 | -2.922 | 0.001 | -2.29        | 0.67        |
| 180 | -1.183 | 0.065 | -1.912  | 1.0000 | -2.24  | 0.028 | -1.18        | 0.67        |
| 181 | 0      | 1     | 0.000   | 1.0000 | -0.825 | 0.19  | 0            | 1           |
| 182 | -0.86  | 0.086 | -1.531  | 1.0000 | -2.068 | 0.026 | -0.86        | 0.67        |

|     |        |       |        |        |        |       |       |      |
|-----|--------|-------|--------|--------|--------|-------|-------|------|
| 183 | -1.717 | 0.015 | -3.062 | 1.0000 | -2.723 | 0.006 | -1.72 | 0.67 |
| 184 | -1.693 | 0.027 | -4.572 | 1.0000 | -2.742 | 0.001 | -1.69 | 0.67 |
| 185 | -1.253 | 0.048 | -4.089 | 1.0000 | -2.126 | 0.023 | -1.25 | 0.67 |
| 186 | 0      | 1     | 0.000  | 1.0000 | -0.996 | 0.157 | 0     | 1    |
| 187 | 0      | 1     | 0.000  | 1.0000 | -1.013 | 0.19  | 0     | 1    |
| 188 | -1.342 | 0.376 | -1.988 | 0.8415 | -2.153 | 0.109 | -1.17 | 0.67 |
| 189 | -2.56  | 0.001 | -7.654 | 1.0000 | -3.017 | 0     | -2.56 | 0.67 |
| 190 | -0.269 | 0.869 | 0.717  | 0.5893 | 0.756  | 0.427 | -0.36 | 0.67 |
| 191 | 0      | 1     | 0.000  | 1.0000 | -0.802 | 0.172 | 0     | 1    |
| 192 | 0.356  | 0.742 | 1.267  | 0.4965 | -0.242 | 0.424 | 0.36  | 0.57 |
| 193 | 0.719  | 0.587 | 2.495  | 0.3733 | 1.944  | 0.655 | 0.72  | 0.49 |
| 195 | 0.257  | 0.539 | 0.692  | 0.7527 | -0.402 | 0.401 | 0.27  | 0.47 |
| 196 | -1.027 | 0.081 | -1.955 | 1.0000 | -1.867 | 0.043 | -1.03 | 0.67 |
| 197 | -2.262 | 0.001 | -7.654 | 1.0000 | -3.386 | 0     | -2.26 | 0.67 |
| 199 | -1.811 | 0.015 | -3.754 | 1.0000 | -2.74  | 0.007 | -1.81 | 0.67 |
| 200 | 0      | 1     | 0.000  | 1.0000 | -0.825 | 0.19  | 0     | 1    |
| 201 | -0.823 | 0.101 | -1.531 | 1.0000 | -1.815 | 0.039 | -0.82 | 0.67 |
| 202 | 0.253  | 0.461 | 0.765  | 0.6667 | -0.158 | 0.459 | 0.32  | 0.42 |
| 203 | -2.069 | 0.095 | -6.168 | 0.9934 | -2.767 | 0.018 | -2.74 | 0.67 |
| 204 | 0      | 1     | 0.000  | 1.0000 | -0.476 | 0.247 | 0     | 1    |
| 205 | 0.77   | 0.206 | 2.290  | 0.2988 | 0.312  | 0.671 | 3.82  | 0.21 |
| 206 | -1.666 | 0.02  | -3.062 | 1.0000 | -2.481 | 0.008 | -1.67 | 0.67 |
| 207 | -1.749 | 0.015 | -3.062 | 1.0000 | -2.744 | 0.005 | -1.75 | 0.67 |
| 208 | -1.357 | 0.081 | -3.828 | 0.9877 | -2.067 | 0.032 | -1.62 | 0.67 |
| 209 | 0.427  | 0.402 | 1.105  | 0.6155 | -0.152 | 0.481 | 1     | 0.38 |
| 210 | 0      | 1     | 0.000  | 1.0000 | -0.812 | 0.196 | 0     | 1    |
| 211 | -0.839 | 0.082 | -1.531 | 1.0000 | -2.047 | 0.033 | -0.84 | 0.67 |
| 212 | -0.46  | 0.15  | -1.531 | 1.0000 | -1.204 | 0.075 | -0.46 | 0.67 |
| 213 | -1.051 | 0.102 | -1.952 | 1.0000 | -1.843 | 0.05  | -1.05 | 0.67 |
| 214 | -0.809 | 0.314 | -3.759 | 0.9696 | -1.825 | 0.071 | -1.36 | 0.67 |
| 215 | 0      | 1     | 0.000  | 1.0000 | -0.47  | 0.251 | 0     | 1    |
| 216 | 0.779  | 0.262 | 2.180  | 0.3709 | 0.403  | 0.673 | 0.78  | 0.27 |
| 217 | 0.424  | 0.573 | 0.495  | 0.5969 | 0.201  | 0.491 | 0.43  | 0.48 |
| 218 | 0      | 1     | 0.000  | 1.0000 | -0.865 | 0.174 | 0     | 1    |
| 219 | 0      | 1     | 0.000  | 1.0000 | -0.774 | 0.184 | 0     | 1    |
| 220 | 0      | 1     | 0.000  | 1.0000 | -0.466 | 0.247 | 0     | 1    |
| 221 | 0      | 1     | 0.000  | 1.0000 | -0.764 | 0.188 | 0     | 1    |
| 222 | 0      | 1     | 0.000  | 1.0000 | -0.735 | 0.201 | 0     | 1    |
| 223 | -0.613 | 0.13  | -2.045 | 1.0000 | -1.368 | 0.073 | -0.61 | 0.67 |
| 224 | 0      | 1     | 0.000  | 1.0000 | -0.772 | 0.212 | 0     | 1    |
| 225 | -0.617 | 0.146 | -2.044 | 1.0000 | -1.383 | 0.071 | -0.62 | 0.67 |
| 226 | -1.857 | 0.009 | -4.982 | 1.0000 | -2.638 | 0.003 | -1.86 | 0.67 |
| 227 | 0      | 1     | 0.000  | 1.0000 | -0.772 | 0.212 | 0     | 1    |
| 228 | -1.019 | 0.073 | -1.956 | 1.0000 | -1.865 | 0.043 | -1.02 | 0.67 |
| 229 | -2.988 | 0.001 | -5.902 | 1.0000 | -2.942 | 0.002 | -2.99 | 0.67 |
| 230 | -2.479 | 0.009 | -3.824 | 1.0000 | -3.041 | 0.005 | -2.48 | 0.67 |
| 231 | 0      | 1     | 0.000  | 1.0000 | -1.117 | 0.155 | 0     | 1    |
| 232 | 0      | 1     | 0.000  | 1.0000 | -0.466 | 0.247 | 0     | 1    |
| 233 | -2.093 | 0.012 | -6.084 | 1.0000 | -2.639 | 0.005 | -2.09 | 0.67 |
| 234 | -1.049 | 0.072 | -1.952 | 1.0000 | -1.89  | 0.041 | -1.05 | 0.67 |
| 235 | 0      | 1     | 0.000  | 1.0000 | -1.12  | 0.153 | 0     | 1    |
| 236 | -2.488 | 0.025 | -3.723 | 0.9839 | -3.959 | 0.009 | -2.6  | 0.67 |
| 237 | -0.885 | 0.078 | -1.531 | 1.0000 | -2.085 | 0.031 | -0.88 | 0.67 |
| 238 | -1.025 | 0.081 | -1.954 | 1.0000 | -1.866 | 0.043 | -1.03 | 0.67 |
| 239 | 0.993  | 0.08  | 2.859  | 0.2599 | 1.334  | 0.882 | 0.99  | 0.1  |
| 240 | 0.483  | 0.247 | 1.360  | 0.5633 | 0.273  | 0.672 | 0.48  | 0.26 |

|     |        |       |         |        |         |       |              |             |
|-----|--------|-------|---------|--------|---------|-------|--------------|-------------|
| 241 | -0.612 | 0.164 | -2.045  | 1.0000 | -1.319  | 0.085 | -0.61        | 0.67        |
| 242 | 0      | 1     | 0.000   | 1.0000 | -0.812  | 0.196 | 0            | 1           |
| 243 | 0      | 1     | 0.000   | 1.0000 | -1.013  | 0.19  | 0            | 1           |
| 244 | 0      | 1     | 0.000   | 1.0000 | -0.466  | 0.247 | 0            | 0.67        |
| 245 | -0.971 | 0.046 | -3.245  | 1.0000 | -2.014  | 0.023 | -0.97        | 0.67        |
| 246 | -1.023 | 0.105 | -1.955  | 1.0000 | -1.821  | 0.051 | -1.02        | 0.67        |
| 247 | -1.066 | 0.07  | -1.952  | 1.0000 | -1.899  | 0.041 | -1.07        | 0.67        |
| 248 | -0.028 | 0.979 | 0.216   | 0.7000 | -0.795  | 0.296 | -0.04        | 0.67        |
| 249 | 1.719  | 0.062 | 3.826   | 0.1322 | 1.967   | 0.892 | <b>84.59</b> | <b>0.03</b> |
| 250 | 0      | 1     | 0.000   | 1.0000 | -0.969  | 0.167 | 0            | 1           |
| 251 | -2.485 | 0.009 | -3.824  | 1.0000 | -3.044  | 0.005 | -2.48        | 0.67        |
| 252 | -0.507 | 0.689 | -0.020  | 0.6832 | -0.475  | 0.296 | -0.76        | 0.67        |
| 253 | -0.821 | 0.101 | -1.531  | 1.0000 | -1.772  | 0.046 | -0.82        | 0.67        |
| 254 | -0.837 | 0.083 | -1.531  | 1.0000 | -2.045  | 0.033 | -0.84        | 0.67        |
| 255 | -3.741 | 0     | -9.185  | 1.0000 | -5.909  | 0     | -3.74        | 0.67        |
| 256 | -0.366 | 0.301 | -0.876  | 1.0000 | -0.847  | 0.138 | -0.37        | 0.67        |
| 257 | 0      | 1     | 0.000   | 1.0000 | -0.822  | 0.192 | 0            | 1           |
| 258 | 0      | 1     | 0.000   | 1.0000 | -0.487  | 0.241 | 0            | 1           |
| 259 | -0.187 | 0.669 | -0.747  | 0.8867 | -0.622  | 0.246 | -0.41        | 0.67        |
| 260 | -0.36  | 0.703 | 0.000   | 0.7407 | -0.965  | 0.265 | -0.43        | 0.67        |
| 261 | 0      | 1     | 0.000   | 1.0000 | -0.934  | 0.18  | 0            | 1           |
| 262 | 0.254  | 0.46  | 0.765   | 0.6667 | -0.198  | 0.436 | 0.41         | 0.41        |
| 263 | 0      | 1     | 0.000   | 1.0000 | -0.432  | 0.273 | 0            | 1           |
| 264 | 0      | 1     | 0.000   | 1.0000 | -0.996  | 0.157 | 0            | 1           |
| 265 | -2.653 | 0     | -9.185  | 1.0000 | -4.034  | 0     | -2.65        | 0.67        |
| 266 | -2.158 | 0.011 | -3.904  | 1.0000 | -2.569  | 0.009 | -2.16        | 0.67        |
| 267 | -0.143 | 0.879 | 0.000   | 0.7407 | -0.54   | 0.336 | -0.36        | 0.67        |
| 268 | -0.803 | 0.086 | -1.531  | 1.0000 | -2.019  | 0.034 | -0.8         | 0.67        |
| 269 | -0.374 | 0.514 | -1.365  | 0.9377 | -0.588  | 0.258 | -0.62        | 0.67        |
| 270 | -0.692 | 0.402 | -1.533  | 0.8890 | -1.145  | 0.169 | -1.22        | 0.67        |
| 271 | 0      | 1     | 0.000   | 1.0000 | -1.033  | 0.144 | 0            | 1           |
| 272 | -1.663 | 0.016 | -3.062  | 1.0000 | -2.702  | 0.006 | -1.66        | 0.67        |
| 273 | -1338  | 0.007 | -12.403 | 0.9721 | -10.406 | 0.163 | -1257.21     | 0.67        |
| 274 | 0      | 1     | 0.000   | 1.0000 | -1.013  | 0.19  | 0            | 1           |
| 275 | 0      | 1     | 0.000   | 1.0000 | -0.819  | 0.193 | 0            | 1           |
| 276 | -0.611 | 0.111 | -2.045  | 1.0000 | -1.383  | 0.069 | -0.61        | 0.67        |
| 277 | 0      | 1     | 0.000   | 1.0000 | -2.434  | 0.064 | 0            | 1           |
| 278 | 0.565  | 0.566 | 0.636   | 0.5904 | 0.807   | 0.565 | 0.57         | 0.48        |
| 279 | 0      | 1     | 0.000   | 1.0000 | -0.411  | 0.294 | 0            | 1           |
| 280 | -1.949 | 0.015 | -6.244  | 1.0000 | -2.853  | 0     | -1.95        | 0.67        |
| 281 | -2.696 | 0.007 | -3.816  | 1.0000 | -3.128  | 0.005 | -2.69        | 0.67        |
| 282 | -0.83  | 0.089 | -1.531  | 1.0000 | -1.846  | 0.034 | -0.83        | 0.67        |
| 283 | -0.777 | 0.088 | -1.531  | 1.0000 | -1.997  | 0.034 | -0.78        | 0.67        |
| 284 | -0.99  | 0.067 | -1.642  | 1.0000 | -2.163  | 0.027 | -0.99        | 0.67        |
| 285 | -1.049 | 0.103 | -1.952  | 1.0000 | -1.842  | 0.05  | -1.05        | 0.67        |
| 286 | 0      | 1     | 0.000   | 1.0000 | -0.934  | 0.18  | 0            | 1           |
| 287 | 0      | 1     | 0.000   | 1.0000 | -0.96   | 0.171 | 0            | 1           |
| 288 | 0      | 1     | 0.000   | 1.0000 | -1.07   | 0.152 | 0            | 1           |
| 289 | -1.238 | 0.018 | -4.090  | 1.0000 | -2.191  | 0.015 | -1.24        | 0.67        |
| 290 | 0.336  | 0.405 | 0.765   | 0.6667 | -0.124  | 0.476 | 345.24       | 0.18        |
| 291 | -0.677 | 0.107 | -1.531  | 1.0000 | -1.957  | 0.03  | -0.68        | 0.67        |
| 292 | -0.98  | 0.068 | -1.640  | 1.0000 | -2.156  | 0.027 | -0.98        | 0.67        |
| 293 | -2.032 | 0.01  | -6.077  | 1.0000 | -2.634  | 0.004 | -2.03        | 0.67        |
| 294 | -0.817 | 0.102 | -1.531  | 1.0000 | -1.808  | 0.039 | -0.82        | 0.67        |
| 295 | -0.603 | 0.227 | -0.965  | 1.0000 | -1.477  | 0.081 | -0.6         | 0.67        |
| 296 | 0.164  | 0.969 | 0.511   | 0.9993 | -2.287  | 0.237 | -0.19        | 0.67        |

|     |        |       |        |        |        |       |                |             |
|-----|--------|-------|--------|--------|--------|-------|----------------|-------------|
| 297 | -1.855 | 0.013 | -3.062 | 1.0000 | -2.582 | 0.006 | -1.86          | 0.67        |
| 298 | -1.763 | 0.016 | -3.747 | 1.0000 | -2.719 | 0.007 | -1.76          | 0.67        |
| 299 | -2.544 | 0.001 | -6.333 | 1.0000 | -3.422 | 0     | -2.54          | 0.67        |
| 300 | -1.844 | 0.01  | -3.942 | 1.0000 | -2.482 | 0.009 | -1.84          | 0.67        |
| 301 | -2.188 | 0.02  | -3.910 | 1.0000 | -2.555 | 0.011 | -2.19          | 0.67        |
| 302 | -0.619 | 0.129 | -2.043 | 1.0000 | -1.379 | 0.072 | -0.62          | 0.67        |
| 303 | 0      | 1     | 0.000  | 1.0000 | -0.812 | 0.196 | 0              | 1           |
| 304 | -0.614 | 0.111 | -2.045 | 1.0000 | -1.388 | 0.069 | -0.61          | 0.67        |
| 305 | 0      | 1     | 0.000  | 1.0000 | -2.434 | 0.064 | 0              | 1           |
| 306 | 0      | 1     | 0.000  | 1.0000 | -1.12  | 0.153 | 0              | 1           |
| 307 | 0      | 1     | 0.000  | 1.0000 | -1.117 | 0.155 | 0              | 1           |
| 308 | -0.887 | 0.318 | -1.179 | 0.9244 | -1.53  | 0.142 | -0.93          | 0.67        |
| 309 | 0      | 1     | 0.000  | 1.0000 | -0.969 | 0.167 | 0              | 1           |
| 310 | -0.587 | 0.414 | -0.756 | 0.8878 | -1.325 | 0.137 | -0.85          | 0.67        |
| 311 | -0.937 | 0.049 | -3.062 | 1.0000 | -1.989 | 0.024 | -0.94          | 0.67        |
| 312 | 0      | 1     | 0.000  | 1.0000 | -0.767 | 0.187 | 0              | 1           |
| 313 | -1.674 | 0.016 | -3.062 | 1.0000 | -2.478 | 0.009 | -1.67          | 0.67        |
| 314 | -1.142 | 0.131 | -3.852 | 0.9879 | -1.87  | 0.045 | -1.45          | 0.67        |
| 315 | -1.186 | 0.101 | -1.912 | 1.0000 | -2.172 | 0.04  | -1.19          | 0.67        |
| 316 | -1.918 | 0.008 | -6.123 | 1.0000 | -2.727 | 0.001 | -1.92          | 0.67        |
| 317 | 0.704  | 0.693 | 1.596  | 0.4763 | 3.088  | 0.639 | 0.71           | 0.55        |
| 318 | 0      | 1     | 0.000  | 1.0000 | -2.4   | 0.133 | 0              | 1           |
| 319 | -1.509 | 0.017 | -3.062 | 1.0000 | -2.56  | 0.008 | -1.51          | 0.67        |
| 320 | 0      | 1     | 0.000  | 1.0000 | -1.12  | 0.153 | 0              | 1           |
| 321 | 0.209  | 0.749 | 0.627  | 0.6227 | 0.212  | 0.569 | 0.21           | 0.57        |
| 322 | -2.024 | 0.009 | -3.281 | 1.0000 | -2.855 | 0.005 | -2.02          | 0.67        |
| 323 | 1.561  | 0.123 | 3.671  | 0.1971 | 2.51   | 0.858 | 1.56           | 0.15        |
| 324 | -0.989 | 0.382 | -1.532 | 0.8890 | -1.513 | 0.136 | -2.61          | 0.67        |
| 325 | -0.04  | 0.962 | -0.456 | 0.7738 | -0.07  | 0.474 | -1.88          | 0.67        |
| 326 | 1.568  | 0.11  | 3.049  | 0.2671 | 2.056  | 0.867 | <b>1022.88</b> | <b>0</b>    |
| 327 | 0      | 1     | 0.000  | 1.0000 | -0.993 | 0.158 | 0              | 1           |
| 328 | -2.176 | 0.003 | -7.654 | 1.0000 | -3.306 | 0     | -2.18          | 0.67        |
| 329 | 0      | 1     | 0.000  | 1.0000 | -0.822 | 0.192 | 0              | 1           |
| 330 | -4.172 | 0.001 | -9.280 | 1.0000 | -6.096 | 0     | -4.17          | 0.67        |
| 331 | -1.681 | 0.016 | -3.062 | 1.0000 | -2.482 | 0.009 | -1.68          | 0.67        |
| 332 | 0.872  | 0.126 | 2.234  | 0.3940 | 0.763  | 0.797 | 12.95          | 0.11        |
| 333 | -1     | 0.309 | -2.480 | 0.9382 | -2.171 | 0.024 | -1.55          | 0.67        |
| 334 | 0      | 1     | 0.000  | 1.0000 | -0.517 | 0.224 | 0              | 1           |
| 335 | 0      | 1     | 0.000  | 1.0000 | -0.767 | 0.187 | 0              | 1           |
| 336 | 0      | 1     | 0.000  | 1.0000 | -1.033 | 0.144 | 0              | 1           |
| 337 | -1.546 | 0.005 | -6.123 | 1.0000 | -2.819 | 0.001 | -1.54          | 0.67        |
| 338 | -1.903 | 0.008 | -6.123 | 1.0000 | -2.589 | 0.004 | -1.9           | 0.67        |
| 339 | 0      | 1     | 0.000  | 1.0000 | -2.434 | 0.064 | 0              | 1           |
| 340 | -2.37  | 0.011 | -5.566 | 1.0000 | -3.181 | 0     | -2.37          | 0.67        |
| 341 | -1.931 | 0.064 | -6.644 | 0.9951 | -2.843 | 0.008 | -2.54          | 0.67        |
| 342 | 0      | 1     | 0.000  | 1.0000 | -1.013 | 0.19  | 0              | 1           |
| 343 | -0.486 | 0.147 | -1.772 | 1.0000 | -1.563 | 0.06  | -0.49          | 0.67        |
| 344 | 0.412  | 0.433 | 1.051  | 0.6453 | -0.209 | 0.467 | 0.98           | 0.4         |
| 345 | -0.956 | 0.253 | -3.757 | 0.9699 | -2.051 | 0.058 | -1.49          | 0.67        |
| 346 | -1.368 | 0.023 | -3.062 | 1.0000 | -2.585 | 0.006 | -1.37          | 0.67        |
| 347 | -1.533 | 0.127 | -5.360 | 0.9945 | -2.038 | 0.042 | -1.61          | 0.67        |
| 348 | 0.852  | 0.499 | 2.813  | 0.3049 | 1.784  | 0.713 | <b>2033.2</b>  | <b>0.02</b> |
| 349 | -1.756 | 0.013 | -3.062 | 1.0000 | -2.735 | 0.006 | -1.76          | 0.67        |
| 350 | -1.987 | 0.013 | -3.776 | 1.0000 | -2.819 | 0.006 | -1.99          | 0.67        |
| 351 | 0.508  | 0.297 | 1.531  | 0.4444 | 0.114  | 0.606 | 19.38          | 0.22        |
| 352 | -2.87  | 0.002 | -5.901 | 1.0000 | -2.908 | 0.002 | -2.87          | 0.67        |



|     |        |       |         |        |         |       |       |      |
|-----|--------|-------|---------|--------|---------|-------|-------|------|
| 353 | -0.783 | 0.343 | -1.247  | 0.9308 | -1.038  | 0.19  | -1.05 | 0.67 |
| 354 | -3.068 | 0.001 | -8.040  | 1.0000 | -3.045  | 0     | -3.07 | 0.67 |
| 355 | -1.052 | 0.072 | -1.952  | 1.0000 | -1.927  | 0.035 | -1.05 | 0.67 |
| 356 | -0.816 | 0.084 | -1.531  | 1.0000 | -2.029  | 0.033 | -0.82 | 0.67 |
| 357 | 0      | 1     | 0.000   | 1.0000 | -0.822  | 0.192 | 0     | 1    |
| 358 | 1.221  | 0.179 | 3.087   | 0.2740 | 1.273   | 0.756 | 5.5   | 0.19 |
| 359 | 0      | 1     | 0.000   | 1.0000 | -1.117  | 0.155 | 0     | 1    |
| 360 | 0      | 1     | 0.000   | 1.0000 | -2.434  | 0.064 | 0     | 1    |
| 361 | -1.236 | 0.012 | -4.555  | 1.0000 | -2.596  | 0.004 | -1.24 | 0.67 |
| 362 | -0.615 | 0.312 | -2.749  | 0.9731 | -1.421  | 0.105 | -0.89 | 0.67 |
| 363 | -0.97  | 0.091 | -2.758  | 1.0000 | -2.246  | 0.016 | -0.97 | 0.67 |
| 364 | -0.256 | 0.365 | -0.887  | 1.0000 | -0.572  | 0.17  | -0.26 | 0.67 |
| 365 | -0.848 | 0.133 | -1.531  | 1.0000 | -2.026  | 0.037 | -0.85 | 0.67 |
| 366 | -4.464 | 0.003 | -6.440  | 0.9874 | -10.186 | 0     | -5.21 | 0.67 |
| 367 | -0.723 | 0.13  | -2.627  | 1.0000 | -1.787  | 0.034 | -0.72 | 0.67 |
| 368 | -1.002 | 0.164 | -3.409  | 0.9845 | -1.363  | 0.107 | -1.25 | 0.67 |
| 369 | -1.046 | 0.103 | -1.952  | 1.0000 | -1.839  | 0.05  | -1.05 | 0.67 |
| 370 | 0      | 1     | 0.000   | 1.0000 | -1.117  | 0.155 | 0     | 1    |
| 371 | -0.817 | 0.09  | -1.531  | 1.0000 | -1.798  | 0.041 | -0.82 | 0.67 |
| 372 | 0      | 1     | 0.000   | 1.0000 | -1.07   | 0.152 | 0     | 1    |
| 373 | -2.047 | 0.007 | -6.079  | 1.0000 | -2.64   | 0.004 | -2.05 | 0.67 |
| 374 | 0.489  | 0.485 | 1.171   | 0.7602 | -0.291  | 0.49  | 0.55  | 0.43 |
| 375 | -2.273 | 0.008 | -6.123  | 1.0000 | -3.282  | 0.001 | -2.27 | 0.67 |
| 376 | 0      | 1     | 0.000   | 1.0000 | -1.013  | 0.19  | 0     | 1    |
| 377 | 0      | 1     | 0.000   | 1.0000 | -0.934  | 0.18  | 0     | 1    |
| 378 | -0.883 | 0.038 | -3.062  | 1.0000 | -2.267  | 0.014 | -0.88 | 0.67 |
| 379 | 0      | 1     | 0.000   | 1.0000 | -2.4    | 0.133 | 0     | 1    |
| 380 | -1.573 | 0.009 | -6.123  | 1.0000 | -2.83   | 0.001 | -1.57 | 0.67 |
| 381 | -1.03  | 0.073 | -1.955  | 1.0000 | -1.876  | 0.042 | -1.03 | 0.67 |
| 382 | -0.931 | 0.311 | -1.192  | 0.9250 | -1.564  | 0.141 | -1.23 | 0.67 |
| 383 | -1.889 | 0.004 | -6.123  | 1.0000 | -2.725  | 0.001 | -1.89 | 0.67 |
| 384 | -2.054 | 0.024 | -5.283  | 0.9957 | -2.425  | 0.021 | -2.06 | 0.67 |
| 385 | -0.709 | 0.103 | -1.531  | 1.0000 | -1.712  | 0.04  | -0.71 | 0.67 |
| 386 | 0      | 1     | 0.000   | 1.0000 | -0.812  | 0.196 | 0     | 1    |
| 387 | 0.01   | 0.989 | -0.765  | 0.7901 | -0.618  | 0.29  | 0.02  | 0.66 |
| 388 | -0.856 | 0.449 | -1.526  | 0.8599 | -1.585  | 0.162 | -0.44 | 0.67 |
| 389 | -0.921 | 0.314 | -1.191  | 0.9250 | -1.56   | 0.142 | -1.16 | 0.67 |
| 390 | -0.611 | 0.164 | -2.045  | 1.0000 | -1.317  | 0.085 | -0.61 | 0.67 |
| 391 | -0.445 | 0.185 | -1.332  | 1.0000 | -1.158  | 0.082 | -0.44 | 0.67 |
| 392 | -1.452 | 0.025 | -3.062  | 1.0000 | -2.391  | 0.01  | -1.45 | 0.67 |
| 393 | -1.667 | 0.016 | -3.062  | 1.0000 | -2.494  | 0.007 | -1.67 | 0.67 |
| 394 | -0.95  | 0.04  | -3.062  | 1.0000 | -2.065  | 0.017 | -0.95 | 0.67 |
| 395 | 0      | 1     | 0.000   | 1.0000 | -1.12   | 0.153 | 0     | 1    |
| 396 | 0      | 1     | 0.000   | 1.0000 | -0.812  | 0.196 | 0     | 1    |
| 397 | -0.677 | 0.1   | -1.531  | 1.0000 | -1.905  | 0.038 | -0.68 | 0.67 |
| 398 | 0      | 1     | 0.000   | 1.0000 | -1.07   | 0.152 | 0     | 1    |
| 399 | -4.174 | 0     | -12.152 | 1.0000 | -4.041  | 0     | -4.18 | 0.67 |
| 400 | -0.966 | 0.039 | -3.062  | 1.0000 | -2.082  | 0.016 | -0.97 | 0.67 |
| 401 | -0.977 | 0.091 | -2.761  | 1.0000 | -2.255  | 0.015 | -0.98 | 0.67 |
| 402 | 0      | 1     | 0.000   | 1.0000 | -0.764  | 0.188 | 0     | 1    |
| 403 | -0.848 | 0.087 | -1.531  | 1.0000 | -2.071  | 0.029 | -0.85 | 0.67 |
| 404 | -0.86  | 0.049 | -3.482  | 1.0000 | -2.193  | 0.018 | -0.86 | 0.67 |
| 405 | 0      | 1     | 0.000   | 1.0000 | -1.117  | 0.155 | 0     | 1    |
| 406 | 0      | 1     | 0.000   | 1.0000 | -1.117  | 0.155 | 0     | 1    |
| 407 | -3.91  | 0     | -9.185  | 1.0000 | -4.442  | 0     | -3.91 | 0.67 |
| 408 | -1.761 | 0.018 | -3.434  | 1.0000 | -2.471  | 0.01  | -1.76 | 0.67 |

|     |        |       |         |        |        |       |        |      |
|-----|--------|-------|---------|--------|--------|-------|--------|------|
| 409 | -0.862 | 0.086 | -1.531  | 1.0000 | -2.111 | 0.025 | -0.86  | 0.67 |
| 410 | 0      | 1     | 0.000   | 1.0000 | -1.12  | 0.153 | 0      | 1    |
| 411 | -1.604 | 0.012 | -4.924  | 1.0000 | -2.545 | 0.005 | -1.6   | 0.67 |
| 412 | -0.852 | 0.087 | -1.531  | 1.0000 | -2.105 | 0.025 | -0.85  | 0.67 |
| 413 | -2.162 | 0.011 | -3.904  | 1.0000 | -2.569 | 0.009 | -2.16  | 0.67 |
| 414 | -1.668 | 0.007 | -4.592  | 1.0000 | -2.605 | 0.004 | -1.67  | 0.67 |
| 415 | -0.821 | 0.101 | -1.531  | 1.0000 | -1.812 | 0.039 | -0.82  | 0.67 |
| 416 | -1.124 | 0.072 | -2.629  | 1.0000 | -2.268 | 0.015 | -1.12  | 0.67 |
| 417 | -0.772 | 0.401 | -1.889  | 0.9131 | -1.172 | 0.171 | -0.83  | 0.67 |
| 418 | -1.93  | 0.004 | -6.123  | 1.0000 | -2.747 | 0.001 | -1.93  | 0.67 |
| 419 | -1.281 | 0.089 | -3.827  | 0.9877 | -2.005 | 0.035 | -1.56  | 0.67 |
| 420 | -2.344 | 0.078 | -3.767  | 0.9557 | -2.578 | 0.052 | -3.14  | 0.67 |
| 421 | 0      | 1     | 0.000   | 1.0000 | -0.969 | 0.167 | 0      | 1    |
| 422 | -3.496 | 0.001 | -6.123  | 1.0000 | -3.405 | 0     | -3.5   | 0.67 |
| 423 | -2.101 | 0.011 | -3.910  | 1.0000 | -2.55  | 0.009 | -2.1   | 0.67 |
| 424 | 0      | 1     | 0.000   | 1.0000 | -0.404 | 0.249 | 0      | 1    |
| 425 | 0.254  | 0.46  | 0.765   | 0.6667 | -0.161 | 0.457 | 0.34   | 0.42 |
| 426 | -1.777 | 0.018 | -3.062  | 1.0000 | -2.741 | 0.006 | -1.78  | 0.67 |
| 427 | -1.646 | 0.04  | -5.408  | 0.9960 | -2.419 | 0.011 | -1.67  | 0.67 |
| 428 | 0      | 1     | 0.000   | 1.0000 | -1.12  | 0.153 | 0      | 1    |
| 429 | -2.184 | 0.005 | -4.592  | 1.0000 | -2.774 | 0.002 | -2.18  | 0.67 |
| 430 | -3.663 | 0     | -10.845 | 1.0000 | -5.587 | 0     | -3.66  | 0.67 |
| 431 | 0      | 1     | 0.000   | 1.0000 | -0.517 | 0.224 | 0      | 1    |
| 432 | -2.549 | 0.002 | -4.862  | 1.0000 | -3.273 | 0.001 | -2.55  | 0.67 |
| 433 | -0.873 | 0.093 | -1.719  | 1.0000 | -1.794 | 0.044 | -0.87  | 0.67 |
| 434 | 0      | 1     | 0.000   | 1.0000 | -0.812 | 0.196 | 0      | 1    |
| 435 | -1.516 | 0.017 | -3.062  | 1.0000 | -2.563 | 0.008 | -1.52  | 0.67 |
| 436 | -1.323 | 0.101 | -4.179  | 0.9906 | -1.999 | 0.037 | -1.62  | 0.67 |
| 437 | 0      | 1     | 0.000   | 1.0000 | -0.822 | 0.192 | 0      | 1    |
| 438 | 0      | 1     | 0.000   | 1.0000 | -0.484 | 0.243 | 0      | 1    |
| 439 | -1.593 | 0.022 | -3.062  | 1.0000 | -2.453 | 0.009 | -1.59  | 0.67 |
| 440 | -0.87  | 0.093 | -1.718  | 1.0000 | -1.79  | 0.044 | -0.87  | 0.67 |
| 441 | 0      | 1     | 0.000   | 1.0000 | -0.766 | 0.195 | 0      | 1    |
| 442 | 0      | 1     | 0.000   | 1.0000 | -0.749 | 0.195 | 0      | 1    |
| 443 | -1.166 | 0.237 | -3.330  | 0.9637 | -2.381 | 0.01  | -1.71  | 0.67 |
| 444 | 1.791  | 0.138 | 3.791   | 0.2380 | 3.6    | 0.805 | 8.54   | 0.11 |
| 445 | 0      | 1     | 0.000   | 1.0000 | -0.812 | 0.196 | 0      | 1    |
| 446 | 0      | 1     | 0.000   | 1.0000 | -0.734 | 0.202 | 0      | 1    |
| 447 | 0.254  | 0.466 | 0.766   | 0.6665 | -0.291 | 0.419 | 0.34   | 0.42 |
| 448 | -1.958 | 0.005 | -6.504  | 1.0000 | -2.728 | 0.001 | -1.96  | 0.67 |
| 449 | 0      | 1     | 0.000   | 1.0000 | -0.734 | 0.202 | 0      | 1    |
| 450 | 0      | 1     | 0.000   | 1.0000 | -1.117 | 0.155 | 0      | 1    |
| 451 | -0.339 | 0.692 | 0.000   | 0.7407 | -0.944 | 0.261 | -0.89  | 0.67 |
| 452 | 0      | 1     | 0.000   | 1.0000 | -0.969 | 0.167 | 0      | 1    |
| 453 | -1.229 | 0.158 | -2.649  | 0.9725 | -1.707 | 0.077 | -1.23  | 0.67 |
| 454 | -0.847 | 0.081 | -1.531  | 1.0000 | -2.046 | 0.033 | -0.85  | 0.67 |
| 455 | 0      | 1     | 0.000   | 1.0000 | -0.39  | 0.259 | 0      | 1    |
| 456 | -1.046 | 0.103 | -1.952  | 1.0000 | -1.839 | 0.05  | -1.05  | 0.67 |
| 457 | -1.063 | 0.069 | -3.505  | 1.0000 | -2.386 | 0.008 | -1.06  | 0.67 |
| 458 | -0.794 | 0.104 | -1.531  | 1.0000 | -1.784 | 0.041 | -0.79  | 0.67 |
| 459 | -1.62  | 0.015 | -3.062  | 1.0000 | -2.677 | 0.007 | -1.62  | 0.67 |
| 460 | -1.701 | 0.011 | -3.968  | 1.0000 | -2.428 | 0.009 | -1.7   | 0.67 |
| 461 | 0.462  | 0.357 | 1.525   | 0.4685 | -0.029 | 0.556 | 0.76   | 0.34 |
| 462 | 0.26   | 0.522 | 0.718   | 0.7268 | -0.362 | 0.412 | 10.65  | 0.4  |
| 463 | 0.537  | 0.36  | 1.446   | 0.5265 | -0.007 | 0.562 | 259.69 | 0.07 |
| 464 | 0      | 1     | 0.000   | 1.0000 | -0.934 | 0.18  | 0      | 1    |

|     |        |       |         |        |        |       |               |             |
|-----|--------|-------|---------|--------|--------|-------|---------------|-------------|
| 465 | -0.699 | 0.35  | -0.736  | 0.8831 | -1.344 | 0.152 | -0.95         | 0.67        |
| 466 | 0      | 1     | 0.000   | 1.0000 | -0.969 | 0.167 | 0             | 1           |
| 467 | -1.687 | 0.013 | -3.062  | 1.0000 | -2.478 | 0.009 | -1.69         | 0.67        |
| 468 | -0.425 | 0.177 | -1.531  | 1.0000 | -1.475 | 0.063 | -0.42         | 0.67        |
| 469 | -2.589 | 0.003 | -4.592  | 1.0000 | -3.245 | 0.001 | -2.59         | 0.67        |
| 470 | -2.71  | 0.003 | -5.626  | 1.0000 | -3.377 | 0.001 | -2.71         | 0.67        |
| 471 | -2.155 | 0.011 | -3.793  | 1.0000 | -2.888 | 0.006 | -2.15         | 0.67        |
| 472 | 0      | 1     | 0.000   | 1.0000 | -0.934 | 0.18  | 0             | 1           |
| 473 | -0.804 | 0.091 | -1.531  | 1.0000 | -1.785 | 0.042 | -0.8          | 0.67        |
| 474 | -1.189 | 0.066 | -1.913  | 1.0000 | -2.24  | 0.028 | -1.19         | 0.67        |
| 475 | -1.182 | 0.065 | -1.911  | 1.0000 | -2.239 | 0.028 | -1.18         | 0.67        |
| 476 | -0.855 | 0.04  | -3.062  | 1.0000 | -2.241 | 0.015 | -0.85         | 0.67        |
| 477 | -3.174 | 0.004 | -5.879  | 1.0000 | -3.01  | 0.002 | -3.18         | 0.67        |
| 478 | -2.616 | 0.001 | -8.891  | 1.0000 | -3.664 | 0     | -2.61         | 0.67        |
| 479 | 0      | 1     | 0.000   | 1.0000 | -1.12  | 0.153 | 0             | 1           |
| 480 | 0      | 1     | 0.000   | 1.0000 | -0.766 | 0.195 | 0             | 1           |
| 481 | -0.853 | 0.081 | -1.531  | 1.0000 | -2.057 | 0.032 | -0.85         | 0.67        |
| 482 | 0      | 1     | 0.000   | 1.0000 | -0.825 | 0.19  | 0             | 1           |
| 483 | 0      | 1     | 0.000   | 1.0000 | -0.484 | 0.243 | 0             | 1           |
| 484 | 0      | 1     | 0.000   | 1.0000 | -1.562 | 0.1   | 0             | 1           |
| 485 | 0      | 1     | 0.000   | 1.0000 | -1.013 | 0.19  | 0             | 1           |
| 486 | -1.183 | 0.034 | -3.301  | 1.0000 | -2.206 | 0.016 | -1.18         | 0.67        |
| 487 | -0.614 | 0.224 | -0.964  | 1.0000 | -1.49  | 0.08  | -0.61         | 0.67        |
| 488 | -2.001 | 0.068 | -3.315  | 0.9603 | -3.588 | 0.022 | -2.52         | 0.67        |
| 489 | 0      | 1     | 0.000   | 1.0000 | -0.735 | 0.201 | 0             | 1           |
| 490 | -1.758 | 0.025 | -3.062  | 1.0000 | -2.531 | 0.009 | -1.76         | 0.67        |
| 491 | -0.6   | 0.408 | -0.775  | 0.8900 | -1.3   | 0.149 | -0.86         | 0.67        |
| 492 | 0      | 1     | 0.000   | 1.0000 | -0.825 | 0.19  | 0             | 1           |
| 493 | -2.452 | 0.033 | -6.666  | 0.9952 | -3.535 | 0.004 | -3.01         | 0.67        |
| 494 | 0      | 1     | 0.000   | 1.0000 | -0.993 | 0.158 | 0             | 1           |
| 495 | -5.327 | 0.002 | -10.785 | 1.0000 | -4.389 | 0.002 | -5.33         | 0.67        |
| 496 | -1.183 | 0.066 | -1.912  | 1.0000 | -2.237 | 0.028 | -1.18         | 0.67        |
| 497 | -1.207 | 0.064 | -1.913  | 1.0000 | -2.251 | 0.027 | -1.21         | 0.67        |
| 498 | -1.323 | 0.043 | -4.421  | 1.0000 | -2.6   | 0.002 | -1.32         | 0.67        |
| 499 | -1.051 | 0.072 | -1.952  | 1.0000 | -1.892 | 0.041 | -1.05         | 0.67        |
| 500 | -0.611 | 0.111 | -2.045  | 1.0000 | -1.383 | 0.069 | -0.61         | 0.67        |
| 501 | -0.771 | 0.085 | -1.615  | 1.0000 | -1.997 | 0.033 | -0.77         | 0.67        |
| 502 | 0      | 1     | 0.000   | 1.0000 | -0.766 | 0.195 | 0             | 1           |
| 503 | 0      | 1     | 0.000   | 1.0000 | -0.735 | 0.201 | 0             | 1           |
| 504 | 0      | 1     | 0.000   | 1.0000 | -0.865 | 0.174 | 0             | 1           |
| 505 | 0.778  | 0.246 | 2.073   | 0.4028 | 0.584  | 0.729 | <b>219.33</b> | <b>0.03</b> |
| 506 | -0.883 | 0.048 | -3.491  | 1.0000 | -2.213 | 0.017 | -0.88         | 0.67        |
| 507 | -2.356 | 0.021 | -3.815  | 1.0000 | -2.989 | 0.008 | -2.35         | 0.67        |
| 508 | -1.33  | 0.083 | -3.827  | 0.9877 | -2.1   | 0.031 | -1.61         | 0.67        |
| 509 | -1.671 | 0.011 | -5.037  | 1.0000 | -2.569 | 0.004 | -1.67         | 0.67        |
| 510 | 0      | 1     | 0.000   | 1.0000 | -1.07  | 0.152 | 0             | 1           |
| 511 | 0      | 1     | 0.000   | 1.0000 | -0.822 | 0.192 | 0             | 1           |
| 512 | -0.74  | 0.143 | -1.751  | 1.0000 | -1.646 | 0.051 | -0.74         | 0.67        |
| 513 | -1.266 | 0.132 | -2.296  | 0.9630 | -1.797 | 0.067 | -1.28         | 0.67        |
| 514 | -0.521 | 0.25  | -0.956  | 1.0000 | -1.348 | 0.092 | -0.52         | 0.67        |
| 515 | 0.531  | 0.362 | 1.444   | 0.5268 | -0.014 | 0.56  | 13.82         | 0.28        |
| 516 | 0      | 1     | 0.000   | 1.0000 | -0.766 | 0.195 | 0             | 1           |
| 517 | 0      | 1     | 0.000   | 1.0000 | -1.117 | 0.155 | 0             | 1           |
| 518 | -1.051 | 0.072 | -1.952  | 1.0000 | -1.892 | 0.041 | -1.05         | 0.67        |
| 519 | 0      | 1     | 0.000   | 1.0000 | -0.993 | 0.158 | 0             | 1           |
| 520 | -0.759 | 0.322 | -0.883  | 0.8996 | -1.424 | 0.143 | -0.77         | 0.67        |

|     |        |       |         |        |        |       |       |      |
|-----|--------|-------|---------|--------|--------|-------|-------|------|
| 521 | -0.823 | 0.116 | -1.531  | 1.0000 | -1.776 | 0.046 | -0.82 | 0.67 |
| 522 | -1.291 | 0.061 | -1.910  | 1.0000 | -2.285 | 0.027 | -1.29 | 0.67 |
| 523 | -1.626 | 0.017 | -3.062  | 1.0000 | -2.46  | 0.009 | -1.63 | 0.67 |
| 524 | -2.625 | 0.104 | -4.083  | 0.9499 | -5.243 | 0.002 | -3.75 | 0.67 |
| 525 | -0.942 | 0.361 | -1.597  | 0.8951 | -1.94  | 0.052 | -1.5  | 0.67 |
| 526 | -0.848 | 0.082 | -1.531  | 1.0000 | -2.054 | 0.032 | -0.85 | 0.67 |
| 527 | -2.402 | 0.009 | -3.817  | 1.0000 | -3.005 | 0.005 | -2.4  | 0.67 |
| 528 | -1.623 | 0.029 | -4.589  | 1.0000 | -2.73  | 0.001 | -1.62 | 0.67 |
| 529 | -0.92  | 0.297 | -1.485  | 0.8827 | -1.808 | 0.111 | -1.43 | 0.67 |
| 530 | 0      | 1     | 0.000   | 1.0000 | -1.562 | 0.1   | 0     | 1    |
| 531 | 0      | 1     | 0.000   | 1.0000 | -1.562 | 0.1   | 0     | 1    |
| 532 | -0.776 | 0.316 | -0.877  | 0.8990 | -1.442 | 0.141 | -1    | 0.67 |
| 533 | -0.461 | 0.149 | -1.531  | 1.0000 | -1.204 | 0.076 | -0.46 | 0.67 |
| 534 | -0.651 | 0.167 | -1.841  | 1.0000 | -1.645 | 0.052 | -0.65 | 0.67 |
| 535 | -2.091 | 0.015 | -5.531  | 1.0000 | -2.986 | 0     | -2.09 | 0.67 |
| 536 | -3.428 | 0.001 | -6.123  | 1.0000 | -4.313 | 0     | -3.43 | 0.67 |
| 537 | -1.371 | 0.02  | -3.062  | 1.0000 | -2.567 | 0.008 | -1.37 | 0.67 |
| 538 | -1.05  | 0.072 | -1.952  | 1.0000 | -1.891 | 0.041 | -1.05 | 0.67 |
| 539 | 0.231  | 0.703 | 0.547   | 0.9336 | -0.796 | 0.321 | 0.77  | 0.55 |
| 540 | -4.419 | 0     | -12.113 | 1.0000 | -4.21  | 0     | -4.42 | 0.67 |
| 541 | 0      | 1     | 0.000   | 1.0000 | -1.562 | 0.1   | 0     | 1    |
| 542 | -3.423 | 0.001 | -6.123  | 1.0000 | -4.301 | 0     | -3.42 | 0.67 |
| 543 | -1.612 | 0.045 | -2.869  | 1.0000 | -2.597 | 0.006 | -1.61 | 0.67 |
| 544 | -2.515 | 0.019 | -3.823  | 1.0000 | -3.071 | 0.008 | -2.51 | 0.67 |
| 545 | 0      | 1     | 0.000   | 1.0000 | -1.117 | 0.155 | 0     | 1    |
| 546 | -0.802 | 0.118 | -1.531  | 1.0000 | -1.752 | 0.047 | -0.8  | 0.67 |
| 547 | -1.381 | 0.056 | -2.840  | 1.0000 | -2.503 | 0.008 | -1.38 | 0.67 |
| 548 | 0      | 1     |         | 1.0000 | -2.4   | 0.133 | 0     | 1    |
| 549 | -6.184 | 0     | -9.499  | 1.0000 | -10.84 | 0     | -6.18 | 0.67 |
| 550 | -1.018 | 0.083 | -2.637  | 1.0000 | -2.196 | 0.017 | -1.02 | 0.67 |
| 551 | 0      | 1     | 0.000   | 1.0000 | -0.764 | 0.188 | 0     | 1    |
| 552 | 0      | 1     | 0.000   | 1.0000 | -0.934 | 0.18  | 0     | 1    |
| 553 | 0      | 1     | 0.000   | 1.0000 | -1.117 | 0.155 | 0     | 1    |
| 554 | 0      | 1     | 0.000   | 1.0000 | -1.562 | 0.1   | 0     | 1    |
| 555 | -0.847 | 0.087 | -1.531  | 1.0000 | -2.073 | 0.029 | -0.85 | 0.67 |
| 556 | -1.629 | 0.016 | -3.983  | 1.0000 | -2.379 | 0.012 | -1.63 | 0.67 |
| 557 | -2.908 | 0.002 | -4.902  | 1.0000 | -3.509 | 0.001 | -2.91 | 0.67 |
| 558 | -0.95  | 0.077 | -1.531  | 1.0000 | -2.094 | 0.028 | -0.95 | 0.67 |
| 559 | 0      | 1     | 0.000   | 1.0000 | -0.969 | 0.167 | 0     | 1    |
| 560 | -2.612 | 0.001 | -8.151  | 1.0000 | -2.875 | 0.001 | -2.61 | 0.67 |
| 561 | -1.743 | 0.024 | -4.379  | 1.0000 | -2.703 | 0.001 | -1.74 | 0.67 |
| 562 | -1.347 | 0.023 | -3.062  | 1.0000 | -2.561 | 0.007 | -1.35 | 0.67 |
| 563 | 0.287  | 0.436 | 0.765   | 0.6668 | -0.123 | 0.477 | 0.58  | 0.4  |
| 564 | 0      | 1     | 0.000   | 1.0000 | -1.117 | 0.155 | 0     | 1    |
| 565 | -0.842 | 0.319 | -3.113  | 0.9563 | -1.47  | 0.099 | -1.22 | 0.67 |
| 566 | -2.823 | 0.003 | -6.123  | 1.0000 | -3.086 | 0.001 | -2.82 | 0.67 |
| 567 | -0.95  | 0.077 | -1.531  | 1.0000 | -2.124 | 0.024 | -0.95 | 0.67 |
| 568 | -0.819 | 0.081 | -1.531  | 1.0000 | -1.786 | 0.044 | -0.82 | 0.67 |
| 569 | -0.612 | 0.13  | -2.045  | 1.0000 | -1.365 | 0.073 | -0.61 | 0.67 |
| 570 | 0      | 1     | 0.000   | 1.0000 | -2.4   | 0.133 | 0     | 1    |
| 571 | 0.47   | 0.564 | 1.108   | 0.8478 | -0.452 | 0.461 | 0.47  | 0.48 |
| 572 | 0      | 1     | 0.000   | 1.0000 | -0.766 | 0.195 | 0     | 1    |
| 573 | 0      | 1     | 0.000   | 1.0000 | -0.484 | 0.243 | 0     | 1    |
| 574 | -1.749 | 0.223 | -3.176  | 0.9216 | -1.58  | 0.114 | -3.01 | 0.67 |
| 575 | 0      | 1     | 0.000   | 1.0000 | -0.487 | 0.241 | 0     | 1    |
| 576 | -0.868 | 0.094 | -1.718  | 1.0000 | -1.789 | 0.045 | -0.87 | 0.67 |

|     |        |       |        |        |        |       |        |      |
|-----|--------|-------|--------|--------|--------|-------|--------|------|
| 577 | 0      | 1     | 0.000  | 1.0000 | -0.819 | 0.193 | 0      | 1    |
| 578 | 0      | 1     | 0.000  | 1.0000 | -0.822 | 0.192 | 0      | 1    |
| 579 | 0      | 1     | 0.000  | 1.0000 | -1.013 | 0.19  | 0      | 1    |
| 580 | -0.584 | 0.513 | -0.578 | 0.8317 | -0.716 | 0.295 | -1.11  | 0.67 |
| 581 | 0      | 1     | 0.000  | 1.0000 | -0.819 | 0.193 | 0      | 1    |
| 582 | -1.592 | 0.039 | -3.721 | 1.0000 | -2.613 | 0.012 | -1.59  | 0.67 |
| 583 | -1.055 | 0.157 | -3.392 | 0.9843 | -1.42  | 0.101 | -1.06  | 0.67 |
| 584 | -1.025 | 0.101 | -1.954 | 1.0000 | -1.86  | 0.044 | -1.03  | 0.67 |
| 585 | -1.814 | 0.017 | -3.438 | 1.0000 | -2.491 | 0.009 | -1.81  | 0.67 |
| 586 | -1.883 | 0.012 | -6.134 | 1.0000 | -2.586 | 0.004 | -1.88  | 0.67 |
| 587 | -1.029 | 0.037 | -3.549 | 1.0000 | -2.337 | 0.013 | -1.03  | 0.67 |
| 588 | -1.893 | 0.012 | -6.134 | 1.0000 | -2.59  | 0.004 | -1.89  | 0.67 |
| 589 | -3.6   | 0.001 | -7.947 | 1.0000 | -3.293 | 0     | -3.6   | 0.67 |
| 590 | 0      | 1     | 0.000  | 1.0000 | -1.117 | 0.155 | 0      | 1    |
| 591 | 0      | 1     | 0.000  | 1.0000 | -0.767 | 0.187 | 0      | 1    |
| 592 | -1.414 | 0.021 | -3.062 | 1.0000 | -2.592 | 0.007 | -1.41  | 0.67 |
| 593 | 0.254  | 0.46  | 0.765  | 0.6667 | -0.198 | 0.436 | 0.4    | 0.41 |
| 594 | -0.825 | 0.1   | -1.531 | 1.0000 | -1.776 | 0.046 | -0.82  | 0.67 |
| 595 | 0.254  | 0.465 | 0.766  | 0.6666 | -0.335 | 0.396 | 0.34   | 0.42 |
| 596 | -1.417 | 0.012 | -4.592 | 1.0000 | -2.494 | 0.005 | -1.42  | 0.67 |
| 597 | 0      | 1     | 0.000  | 1.0000 | -0.766 | 0.195 | 0      | 1    |
| 598 | -0.747 | 0.245 | -2.296 | 0.9630 | -1.321 | 0.098 | -1.01  | 0.67 |
| 599 | 0      | 1     | 0.000  | 1.0000 | -0.802 | 0.172 | 0      | 1    |
| 600 | 0.289  | 0.435 | 0.765  | 0.6667 | -0.169 | 0.453 | 0.56   | 0.4  |
| 601 | 0      | 1     | 0.000  | 1.0000 | -0.484 | 0.243 | 0      | 1    |
| 602 | -0.858 | 0.086 | -1.531 | 1.0000 | -2.079 | 0.029 | -0.86  | 0.67 |
| 603 | -1.193 | 0.065 | -1.913 | 1.0000 | -2.244 | 0.027 | -1.19  | 0.67 |
| 604 | 0.281  | 0.456 | 0.725  | 0.7036 | -0.145 | 0.468 | 323.71 | 0.15 |
| 605 | 0      | 1     | 0.000  | 1.0000 | -0.822 | 0.192 | 0      | 1    |
| 606 | -0.239 | 0.383 | -0.876 | 1.0000 | -0.499 | 0.183 | -0.24  | 0.67 |
| 607 | 0.835  | 0.267 | 2.106  | 0.4160 | 0.362  | 0.629 | 40.23  | 0.19 |
| 608 | 0      | 1     | 0.000  | 1.0000 | -0.934 | 0.18  | 0      | 1    |
| 609 | -0.801 | 0.341 | -1.261 | 0.9316 | -1.049 | 0.19  | -1.1   | 0.67 |
| 610 | -0.311 | 0.708 | 0.000  | 0.7407 | -0.678 | 0.291 | -0.66  | 0.67 |
| 611 | -2.079 | 0.02  | -3.930 | 1.0000 | -2.538 | 0.009 | -2.08  | 0.67 |
| 612 | -2.544 | 0.005 | -8.177 | 1.0000 | -2.846 | 0.001 | -2.54  | 0.67 |
| 613 | 0      | 1     | 0.000  | 1.0000 | -2.4   | 0.133 | 0      | 1    |
| 614 | 0      | 1     | 0.000  | 1.0000 | -0.969 | 0.167 | 0      | 1    |
| 615 | 0.204  | 0.462 | 0.681  | 0.7489 | -0.064 | 0.491 | 0.2    | 0.42 |
| 616 | -1.877 | 0.004 | -6.135 | 1.0000 | -2.602 | 0.003 | -1.88  | 0.67 |
| 617 | -1.397 | 0.045 | -3.703 | 1.0000 | -2.603 | 0.003 | -1.4   | 0.67 |
| 618 | 0.227  | 0.37  | 0.765  | 0.6669 | 0.044  | 0.545 | 0.23   | 0.36 |
| 619 | -1.844 | 0.036 | -2.886 | 1.0000 | -2.677 | 0.005 | -1.84  | 0.67 |
| 620 | 0.198  | 0.847 | 1.531  | 0.4609 | -0.051 | 0.465 | 0.31   | 0.62 |
| 621 | 0      | 1     | 0.000  | 1.0000 | -1.562 | 0.1   | 0      | 1    |
| 622 | -0.834 | 0.088 | -1.531 | 1.0000 | -1.817 | 0.04  | -0.83  | 0.67 |
| 623 | -0.567 | 0.42  | -0.765 | 0.8889 | -0.958 | 0.189 | -0.83  | 0.67 |
| 624 | 0.818  | 0.188 | 2.296  | 0.2963 | 0.517  | 0.73  | 32.26  | 0.13 |
| 625 | 0      | 1     | 0.000  | 1.0000 | -0.766 | 0.195 | 0      | 1    |
| 626 | 0.405  | 0.373 | 0.875  | 0.6362 | -0.225 | 0.45  | 57.82  | 0.28 |
| 627 | -0.644 | 0.168 | -1.840 | 1.0000 | -1.629 | 0.053 | -0.64  | 0.67 |
| 628 | 0      | 1     | 0.000  | 1.0000 | -0.993 | 0.158 | 0      | 1    |
| 629 | 0      | 1     | 0.000  | 1.0000 | -0.764 | 0.188 | 0      | 1    |
| 630 | 0      | 1     | 0.000  | 1.0000 | -0.204 | 0.346 | 0      | 1    |
| 631 | 0.585  | 0.13  | 1.531  | 0.4444 | 0.304  | 0.682 | 1.44   | 0.15 |
| 632 | 0      | 1     | 0.000  | 1.0000 | -0.391 | 0.261 | 0      | 1    |

|            |        |       |        |        |        |       |       |      |
|------------|--------|-------|--------|--------|--------|-------|-------|------|
| <b>633</b> | -0.819 | 0.116 | -1.531 | 1.0000 | -1.771 | 0.046 | -0.82 | 0.67 |
| <b>634</b> | 0      | 1     | 0.000  | 1.0000 | -0.479 | 0.24  | 0     | 1    |
| <b>635</b> | 0      | 1     | 0.000  | 1.0000 | -0.391 | 0.261 | 0     | 1    |
| <b>636</b> | 0      | 1     | 0.000  | 1.0000 | -0.402 | 0.251 | 0     | 1    |
| <b>637</b> | 0      | 1     | 0.000  | 1.0000 | -0.391 | 0.261 | 0     | 1    |
| <b>638</b> | 0      | 1     | 0.000  | 1.0000 | -0.47  | 0.251 | 0     | 1    |
| <b>639</b> | -1.849 | 0.013 | -3.114 | 1.0000 | -2.779 | 0.006 | -1.85 | 0.67 |
| <b>640</b> | -0.308 | 0.71  | 0.000  | 0.7407 | -0.614 | 0.313 | -0.85 | 0.67 |
| <b>641</b> | -1.211 | 0.064 | -1.912 | 1.0000 | -2.253 | 0.027 | -1.21 | 0.67 |

---

p values < 0.05 or posterior probability > 0.9 are shown in bold.
